# Supplementary material for: In Vivo Human Single‐Chain Fragment Variable Phage Display‐Assisted Identification of Galectin‐3 as a New Biomarker of Atherosclerosis
Source: PubMed Central journal article supplement — J Am Heart Assoc. 2021 Sep 25;10(19):e016287. doi: 10.1161/JAHA.120.016287 (PMC8649142; doi:10.1161/jaha.120.016287), 2021-09-25
Supplement: JAH3-10-e016287-s001.pdf [file JAH3-10-e016287-s001.pdf]

# **SUPPLEMENTAL MATERIAL**

**Table S1. LC/MS/MS analyses.**

| Accession | Description                                                                      | MW [kDa] | Abundance Ratio: (Gal3Ab-Gal3R) / (P3-PH) | Abundance Ratio: (C4-PH) / (P3-PH) | Abundances: P3-PH | Abundances: Gal3Ab-Gal3R | Abundances: C4-PH |
|-----------|----------------------------------------------------------------------------------|----------|-------------------------------------------|------------------------------------|-------------------|--------------------------|-------------------|
| P04264    | Keratin. type II cytoskeletal 1 OS=Homo sapiens OX=9606 GN=KRT1 PE=1 SV=6        | 66       | 2.33                                      | 1.225                              | 45 381 190        | 105 509 281              | 55 462 114        |
| P35527    | Keratin. type I cytoskeletal 9 OS=Homo sapiens OX=9606 GN=KRT9 PE=1 SV=3         | 62       | 2.616                                     | 1.106                              | 526 112 111       | 1 368 298 427            | 826 012 151       |
| P13645    | Keratin. type I cytoskeletal 10 OS=Homo sapiens OX=9606 GN=KRT10 PE=1 SV=6       | 58.8     | 1.188                                     | 1.332                              | 807 546 518       | 923 347 631              | 1 097 290 637     |
| P13647    | Keratin. type II cytoskeletal 5 OS=Homo sapiens OX=9606 GN=KRT5 PE=1 SV=3        | 62.3     | 1.701                                     | 1.701                              | 58 165 573        | 117 840 313              | 111 121 533       |
| P15924    | Desmoplakin OS=Homo sapiens OX=9606 GN=DSP PE=1 SV=3                             | 331.6    | 2.345                                     | 1.134                              | 22 454 072        | 52 833 781               | 23 573 337        |
| P02538    | Keratin. type II cytoskeletal 6A OS=Homo sapiens OX=9606 GN=KRT6A PE=1 SV=3      | 60       | 1.454                                     | 0.375                              | 10 841 863        | 15 352 283               | 3 805 985         |
| P04259    | Keratin. type II cytoskeletal 6B OS=Homo sapiens OX=9606 GN=KRT6B PE=1 SV=5      | 60       | 0.859                                     | 0.588                              | 5 179 109         | 4 525 792                | 2 750 493         |
| P02533    | Keratin. type I cytoskeletal 14 OS=Homo sapiens OX=9606 GN=KRT14 PE=1 SV=4       | 51.5     | 1.374                                     | 1.24                               | 32 955 718        | 50 877 777               | 38 641 899        |
| P08779    | Keratin. type I cytoskeletal 16 OS=Homo sapiens OX=9606 GN=KRT16 PE=1 SV=4       | 51.2     | 1.266                                     | 0.551                              | 28 412 636        | 35 940 365               | 15 478 307        |
| P21333    | Filamin-A OS=Homo sapiens OX=9606 GN=FLNA PE=1 SV=4                              | 280.6    | 0.837                                     | 31.76                              | 2 331 699         | 113 268                  | 184 168 581       |
| P78385    | Keratin. type II cuticular Hb3 OS=Homo sapiens OX=9606 GN=KRT83 PE=1 SV=2        | 54.2     | 0.001                                     | 0.001                              | 8 831 388         |                          |                   |
| Q86Y23    | Hornerin OS=Homo sapiens OX=9606 GN=HRNR PE=1 SV=2                               | 282.2    | 3.61                                      | 1.218                              | 3 849 321         | 12 238 252               | 4 518 731         |
| P01857    | Immunoglobulin heavy constant gamma 1 OS=Homo sapiens OX=9606 GN=IGHG1 PE=1 SV=1 | 36.1     | 0.787                                     | 166.4                              | 10 092 989        | 8 868 397                | 1 783 465 295     |
| P14923    | Junction plakoglobin OS=Homo sapiens OX=9606 GN=JUP PE=1 SV=3                    | 81.7     | 2.038                                     | 1.186                              | 12 809 734        | 27 080 217               | 15 755 277        |
| Q02413    | Desmoglein-1 OS=Homo sapiens OX=9606 GN=DSG1 PE=1 SV=2                           | 113.7    | 1.072                                     | 1.394                              | 8 753 901         | 11 331 669               | 12 730 080        |

|        |                                                                                  |       |       |       |            |             |               |
|--------|----------------------------------------------------------------------------------|-------|-------|-------|------------|-------------|---------------|
| Q04695 | Keratin. type I cytoskeletal 17 OS=Homo sapiens OX=9606 GN=KRT17 PE=1 SV=2       | 48.1  | 4.332 | 1.145 | 2 988 213  | 14 015 720  | 3 406 516     |
| P01834 | Immunoglobulin kappa constant OS=Homo sapiens OX=9606 GN=IGKC PE=1 SV=2          | 11.8  | 0.392 | 124.2 | 7 322 950  | 3 760 060   | 1 031 345 071 |
| Q7Z794 | Keratin. type II cytoskeletal 1b OS=Homo sapiens OX=9606 GN=KRT77 PE=2 SV=3      | 61.9  | 0.808 | 0.813 | 46 801 707 | 107 950 795 | 77 872 103    |
| P60709 | Actin. cytoplasmic 1 OS=Homo sapiens OX=9606 GN=ACTB PE=1 SV=1                   | 41.7  | 2.303 | 23.77 | 4 824 083  | 10 907 767  | 127 722 848   |
| P62736 | Actin. aortic smooth muscle OS=Homo sapiens OX=9606 GN=ACTA2 PE=1 SV=1           | 42    | 2.389 | 24.64 | 4 088 968  | 2 068 499   | 168 336 149   |
| P07355 | Annexin A2 OS=Homo sapiens OX=9606 GN=ANXA2 PE=1 SV=2                            | 38.6  | 1.416 | 12.17 | 7 486 298  | 11 472 053  | 96 256 829    |
| P35749 | Myosin-11 OS=Homo sapiens OX=9606 GN=MYH11 PE=1 SV=3                             | 227.2 | 0.757 | 13.97 | 125 171    | 226 226     | 22 645 844    |
| P02751 | Fibronectin OS=Homo sapiens OX=9606 GN=FN1 PE=1 SV=4                             | 262.5 | 1.323 | 39.27 | 554 226    | 68 658      | 69 405 208    |
| P12035 | Keratin. type II cytoskeletal 3 OS=Homo sapiens OX=9606 GN=KRT3 PE=1 SV=3        | 64.4  | 1.684 | 1.922 | 160 742    | 602 931     | 683 572       |
| P35579 | Myosin-9 OS=Homo sapiens OX=9606 GN=MYH9 PE=1 SV=4                               | 226.4 | 1000  | 1000  |            | 502 752     | 15 683 738    |
| P04114 | Apolipoprotein B-100 OS=Homo sapiens OX=9606 GN=APOB PE=1 SV=2                   | 515.3 | 1000  | 1000  |            | 49 359      | 26 384 937    |
| O95678 | Keratin. type II cytoskeletal 75 OS=Homo sapiens OX=9606 GN=KRT75 PE=1 SV=2      | 59.5  | 0.001 | 0.001 | 459 243    |             |               |
| P01860 | Immunoglobulin heavy constant gamma 3 OS=Homo sapiens OX=9606 GN=IGHG3 PE=1 SV=2 | 41.3  |       | 1000  |            |             | 39 436 191    |
| Q8N1N4 | Keratin. type II cytoskeletal 78 OS=Homo sapiens OX=9606 GN=KRT78 PE=1 SV=2      | 56.8  | 1.64  | 1.527 | 5 945 200  | 9 888 203   | 7 946 357     |
| P01859 | Immunoglobulin heavy constant gamma 2 OS=Homo sapiens OX=9606 GN=IGHG2 PE=1 SV=2 | 35.9  | 2.117 | 77.93 | 795 076    | 1 426 712   | 54 255 233    |
| P35580 | Myosin-10 OS=Homo sapiens OX=9606 GN=MYH10 PE=1 SV=3                             | 228.9 | 0.001 | 3.44  | 147 192    |             | 10 681 021    |
| P08670 | Vimentin OS=Homo sapiens OX=9606 GN=VIM PE=1 SV=4                                | 53.6  | 0.048 | 6.615 | 10 735 669 | 87 097      | 75 379 085    |

|            |                                                                                             |       |       |       |            |            |            |
|------------|---------------------------------------------------------------------------------------------|-------|-------|-------|------------|------------|------------|
| P19013     | Keratin. type II cytoskeletal 4 OS=Homo sapiens OX=9606 GN=KRT4 PE=1 SV=4                   | 57.3  | 1.97  | 0.274 | 8 086 080  | 16 872 053 | 1 770 839  |
| P13646     | Keratin. type I cytoskeletal 13 OS=Homo sapiens OX=9606 GN=KRT13 PE=1 SV=4                  | 49.6  | 2.499 | 0.765 | 2 982 381  | 7 565 975  | 1 542 532  |
| P12111     | Collagen alpha-3(VI) chain OS=Homo sapiens OX=9606 GN=COL6A3 PE=1 SV=5                      | 343.5 | 0.524 | 17.83 | 648 511    | 79 816     | 47 866 537 |
| Q92764     | Keratin. type I cuticular Ha5 OS=Homo sapiens OX=9606 GN=KRT35 PE=2 SV=5                    | 50.3  | 2.236 | 0.001 | 7 709 838  | 8 583 421  |            |
| Q05707     | Collagen alpha-1(XIV) chain OS=Homo sapiens OX=9606 GN=COL14A1 PE=1 SV=3                    | 193.4 |       | 79.17 | 31 329     | 78 467     | 41 524 411 |
| Q9Y490     | Talin-1 OS=Homo sapiens OX=9606 GN=TLN1 PE=1 SV=3                                           | 269.6 |       | 1000  |            |            | 16 445 393 |
| P46940     | Ras GTPase-activating-like protein IQGAP1 OS=Homo sapiens OX=9606 GN=IQGAP1 PE=1 SV=1       | 189.1 | 3.172 | 6.531 | 299 520    | 792 296    | 28 319 279 |
| P04406     | Glyceraldehyde-3-phosphate dehydrogenase OS=Homo sapiens OX=9606 GN=GAPDH PE=1 SV=3         | 36    | 1.366 | 3.607 | 3 766 910  | 6 067 009  | 18 817 508 |
| Q5D862     | Filaggrin-2 OS=Homo sapiens OX=9606 GN=FLG2 PE=1 SV=1                                       | 247.9 | 1.166 | 1.126 | 1 865 274  | 2 525 897  | 1 940 336  |
| P29508     | Serpin B3 OS=Homo sapiens OX=9606 GN=SERPINB3 PE=1 SV=2                                     | 44.5  | 4.519 | 1.273 | 2 665 624  | 15 747 547 | 3 565 204  |
| P26038     | Moesin OS=Homo sapiens OX=9606 GN=MSN PE=1 SV=3                                             | 67.8  | 1000  | 1000  |            | 28 527     | 14 284 505 |
| A0A286YFJ8 | Immunoglobulin heavy constant gamma 4 (Fragment) OS=Homo sapiens OX=9606 GN=IGHG4 PE=1 SV=1 | 43.8  | 1000  | 1000  |            | 32 076     | 6 207 931  |
| P05089     | Arginase-1 OS=Homo sapiens OX=9606 GN=ARG1 PE=1 SV=2                                        | 34.7  | 1.338 | 1.118 | 2 450 206  | 2 929 382  | 2 874 411  |
| Q08554     | Desmocollin-1 OS=Homo sapiens OX=9606 GN=DSC1 PE=1 SV=2                                     | 99.9  | 1.212 | 2.119 | 3 353 097  | 4 710 847  | 7 365 633  |
| Q5T749     | Keratinocyte proline-rich protein OS=Homo sapiens OX=9606 GN=KPRP PE=1 SV=1                 | 64.1  | 1.095 | 1.608 | 4 589 295  | 7 546 455  | 10 630 003 |
| P17931     | Galectin-3 OS=Homo sapiens OX=9606 GN=LGALS3 PE=1 SV=5                                      | 26.1  | 0.739 | 0.037 | 35 326 405 | 30 552 241 | 1 266 731  |

|        |                                                                                         |       |       |       |           |           |            |
|--------|-----------------------------------------------------------------------------------------|-------|-------|-------|-----------|-----------|------------|
| E9PKE3 | Heat shock cognate 71 kDa protein OS=Homo sapiens OX=9606 GN=HSPA8 PE=1 SV=1            | 68.8  | 1000  | 1000  |           | 535 457   | 2 435 736  |
| Q08188 | Protein-glutamine gamma-glutamyltransferase E OS=Homo sapiens OX=9606 GN=TGM3 PE=1 SV=4 | 76.6  | 1.256 | 0.907 | 4 132 727 | 5 165 512 | 3 745 956  |
| P04083 | Annexin A1 OS=Homo sapiens OX=9606 GN=ANXA1 PE=1 SV=2                                   | 38.7  | 1.51  | 2.346 | 3 110 045 | 4 500 463 | 8 648 641  |
| P12814 | Alpha-actinin-1 OS=Homo sapiens OX=9606 GN=ACTN1 PE=1 SV=2                              | 103   | 0.001 | 18.98 | 54 288    |           | 2 606 953  |
| Q7Z3Y8 | Keratin, type I cytoskeletal 27 OS=Homo sapiens OX=9606 GN=KRT27 PE=1 SV=2              | 49.8  | 0.001 | 2.116 | 690 173   |           | 1 986 529  |
| Q13813 | Spectrin alpha chain, non-erythrocytic 1 OS=Homo sapiens OX=9606 GN=SPTAN1 PE=1 SV=3    | 284.4 | 0.592 | 3.895 | 32 298    | 68 760    | 5 824 759  |
| P01024 | Complement C3 OS=Homo sapiens OX=9606 GN=C3 PE=1 SV=2                                   | 187   | 1.11  | 14.65 | 238 945   | 658 899   | 9 816 719  |
| Q3SY84 | Keratin, type II cytoskeletal 71 OS=Homo sapiens OX=9606 GN=KRT71 PE=1 SV=3             | 57.3  | 0.001 | 2.108 | 1 631 769 |           | 1 702 343  |
| P31944 | Caspase-14 OS=Homo sapiens OX=9606 GN=CASP14 PE=1 SV=2                                  | 27.7  | 2.237 | 1.565 | 1 508 967 | 3 673 264 | 2 994 961  |
| P02675 | Fibrinogen beta chain OS=Homo sapiens OX=9606 GN=FGB PE=1 SV=2                          | 55.9  | 1.682 | 21.6  | 204 267   | 81 373    | 14 895 512 |
| P11021 | Endoplasmic reticulum chaperone BiP OS=Homo sapiens OX=9606 GN=HSPA5 PE=1 SV=2          | 72.3  | 2.581 | 5.152 | 372 169   | 1 822 958 | 4 027 552  |
| O43707 | Alpha-actinin-4 OS=Homo sapiens OX=9606 GN=ACTN4 PE=1 SV=2                              | 104.8 | 2.448 | 5.214 | 74 939    | 281 232   | 2 933 348  |
| P25311 | Zinc-alpha-2-glycoprotein OS=Homo sapiens OX=9606 GN=AZGP1 PE=1 SV=2                    | 34.2  | 0.618 | 1.454 | 4 171 075 | 2 627 848 | 6 422 387  |
| P0DOY3 | Immunoglobulin lambda constant 3 OS=Homo sapiens OX=9606 GN=IGLC3 PE=1 SV=1             | 11.3  | 1000  | 1000  |           | 63 879    | 23 435 315 |
| P06702 | Protein S100-A9 OS=Homo sapiens OX=9606 GN=S100A9 PE=1 SV=1                             | 13.2  | 2.549 | 1.011 | 3 260 708 | 9 956 036 | 4 538 845  |
| Q71U36 | Tubulin alpha-1A chain OS=Homo sapiens OX=9606 GN=TUBA1A PE=1 SV=1                      | 50.1  | 2.052 | 27.53 | 362 570   | 745 243   | 10 901 197 |

|            |                                                                                                      |       |       |       |           |           |            |
|------------|------------------------------------------------------------------------------------------------------|-------|-------|-------|-----------|-----------|------------|
| P02649     | Apolipoprotein E OS=Homo sapiens OX=9606<br>GN=APOE PE=1 SV=1                                        | 36.1  | 0.001 | 24.7  | 889 811   |           | 40 309 038 |
| Q6KB66     | Keratin. type II cytoskeletal 80 OS=Homo<br>sapiens OX=9606 GN=KRT80 PE=1 SV=2                       | 50.5  | 1.725 | 1.046 | 2 250 313 | 4 044 348 | 2 511 371  |
| Q15063     | Periostin OS=Homo sapiens OX=9606<br>GN=POSTN PE=1 SV=2                                              | 93.3  | 0.001 | 70.78 | 35 600    |           | 13 290 139 |
| A0A1B0GUU9 | Immunoglobulin heavy constant mu<br>(Fragment) OS=Homo sapiens OX=9606<br>GN=IGHM PE=1 SV=1          | 51.9  | 0.171 | 11.48 | 2 232 212 | 92 462    | 26 343 097 |
| P55072     | Transitional endoplasmic reticulum ATPase<br>OS=Homo sapiens OX=9606 GN=VCP PE=1<br>SV=4             | 89.3  | 0.123 | 0.099 | 8 671 478 | 1 549 892 | 2 472 195  |
| Q14CN4     | Keratin. type II cytoskeletal 72 OS=Homo<br>sapiens OX=9606 GN=KRT72 PE=1 SV=2                       | 55.8  | 0.438 |       | 1 825 028 | 1 574 891 | 34 582     |
| A0A087WV2  | Ribosome-binding protein 1 OS=Homo<br>sapiens OX=9606 GN=RRBP1 PE=1 SV=1                             | 102.7 |       | 1000  |           |           | 3 987 261  |
| P04004     | Vitronectin OS=Homo sapiens OX=9606<br>GN=VTN PE=1 SV=1                                              | 54.3  | 0.638 | 85.16 | 810 878   | 160 756   | 71 415 327 |
| Q8IUX7     | Adipocyte enhancer-binding protein 1<br>OS=Homo sapiens OX=9606 GN=AEBP1 PE=1<br>SV=1                | 130.8 |       | 1000  |           |           | 11 142 930 |
| P68371     | Tubulin beta-4B chain OS=Homo sapiens<br>OX=9606 GN=TUBB4B PE=1 SV=1                                 | 49.8  | 5.825 | 14.72 | 19 223    | 152 610   | 1 062 723  |
| Q6UWP8     | Suprabasin OS=Homo sapiens OX=9606<br>GN=SBSN PE=1 SV=2                                              | 60.5  | 1.615 | 1.485 | 246 320   | 583 046   | 320 064    |
| A0A0B4J231 | Immunoglobulin lambda-like polypeptide 5<br>OS=Homo sapiens OX=9606 GN=IGLL5 PE=1<br>SV=1            | 23.1  | 2.034 | 121.9 | 133 573   | 271 643   | 23 571 627 |
| A0A087X055 | Collagen alpha-1(VI) chain OS=Homo sapiens<br>OX=9606 GN=COL6A1 PE=1 SV=1                            | 108.3 | 0.001 | 66.33 | 242 097   |           | 30 154 159 |
| Q09666     | Neuroblast differentiation-associated protein<br>AHNAK OS=Homo sapiens OX=9606<br>GN=AHNAK PE=1 SV=2 | 628.7 | 0.761 | 7.562 | 469 657   | 286 623   | 4 292 521  |
| Q13867     | Bleomycin hydrolase OS=Homo sapiens<br>OX=9606 GN=BLMH PE=1 SV=1                                     | 52.5  | 1.957 | 1.198 | 1 304 594 | 2 335 275 | 1 614 657  |

|            |                                                                                           |       |       |       |           |           |            |
|------------|-------------------------------------------------------------------------------------------|-------|-------|-------|-----------|-----------|------------|
| Q99715     | Collagen alpha-1(XII) chain OS=Homo sapiens<br>OX=9606 GN=COL12A1 PE=1 SV=2               | 332.9 | 0.001 | 5.481 | 25 882    |           | 4 187 082  |
| P02545     | Prelamin-A/C OS=Homo sapiens OX=9606<br>GN=LMNA PE=1 SV=1                                 | 74.1  | 3.833 | 10.01 | 572 827   | 2 978 452 | 5 817 524  |
| P21810     | Biglycan OS=Homo sapiens OX=9606 GN=BGN<br>PE=1 SV=2                                      | 41.6  | 0.001 | 93.09 | 164 572   |           | 50 722 913 |
| P02647     | Apolipoprotein A-I OS=Homo sapiens<br>OX=9606 GN=APOA1 PE=1 SV=1                          | 30.8  | 0.752 | 8.986 | 1 093 580 | 1 009 112 | 11 281 958 |
| A0A0G2JIW1 | Heat shock 70 kDa protein 1B OS=Homo<br>sapiens OX=9606 GN=HSPA1B PE=1 SV=1               | 70.1  | 1.364 | 8.382 | 84 517    | 481 548   | 2 397 252  |
| P51888     | Prolargin OS=Homo sapiens OX=9606<br>GN=PRELP PE=1 SV=1                                   | 43.8  | 0.001 | 30.13 | 219 197   |           | 20 257 631 |
| P15311     | Ezrin OS=Homo sapiens OX=9606 GN=EZR<br>PE=1 SV=4                                         | 69.4  | 1000  | 1000  |           | 41 623    | 436 838    |
| A0A2R8Y5S7 | Radixin OS=Homo sapiens OX=9606 GN=RDX<br>PE=1 SV=1                                       | 69.3  |       | 1000  |           |           | 549 735    |
| Q5JP53     | Tubulin beta chain OS=Homo sapiens<br>OX=9606 GN=TUBB PE=1 SV=1                           | 47.7  | 0.94  | 53.18 | 22 422    | 21 076    | 5 706 720  |
| C9JEU5     | Fibrinogen gamma chain OS=Homo sapiens<br>OX=9606 GN=FGG PE=1 SV=1                        | 50.3  | 0.001 | 25.87 | 122 868   |           | 14 365 894 |
| P10909     | Clusterin OS=Homo sapiens OX=9606 GN=CLU<br>PE=1 SV=1                                     | 52.5  | 0.348 | 40.32 | 361 040   | 95 260    | 22 649 197 |
| J3QSU6     | Tenascin OS=Homo sapiens OX=9606 GN=TNC<br>PE=1 SV=1                                      | 220.7 |       | 1000  |           |           | 6 574 638  |
| Q01082     | Spectrin beta chain, non-erythrocytic 1<br>OS=Homo sapiens OX=9606 GN=SPTBN1 PE=1<br>SV=2 | 274.4 |       | 1000  |           |           | 2 599 602  |
| P01876     | Immunoglobulin heavy constant alpha 1<br>OS=Homo sapiens OX=9606 GN=IGHA1 PE=1<br>SV=2    | 37.6  | 0.713 | 3.226 | 3 276 026 | 2 484 800 | 12 871 867 |
| P14618     | Pyruvate kinase PKM OS=Homo sapiens<br>OX=9606 GN=PKM PE=1 SV=4                           | 57.9  | 2.228 | 7.358 | 645 019   | 1 894 485 | 6 566 692  |
| P68104     | Elongation factor 1-alpha 1 OS=Homo sapiens<br>OX=9606 GN=EEF1A1 PE=1 SV=1                | 50.1  | 3.596 | 7.059 | 1 380 167 | 6 111 838 | 12 840 624 |

|            |                                                                                                                 |       |       |       |           |            |            |
|------------|-----------------------------------------------------------------------------------------------------------------|-------|-------|-------|-----------|------------|------------|
| P22735     | Protein-glutamine gamma-glutamyltransferase K OS=Homo sapiens OX=9606 GN=TGM1 PE=1 SV=4                         | 89.7  | 1.205 | 1.033 | 791 100   | 1 005 590  | 818 794    |
| Q13835     | Plakophilin-1 OS=Homo sapiens OX=9606 GN=PKP1 PE=1 SV=2                                                         | 82.8  | 3.662 | 1.336 | 943 686   | 3 864 503  | 1 185 744  |
| P04792     | Heat shock protein beta-1 OS=Homo sapiens OX=9606 GN=HSPB1 PE=1 SV=2                                            | 22.8  | 3.509 | 11.81 | 785 763   | 3 944 150  | 18 569 316 |
| P20930     | Filaggrin OS=Homo sapiens OX=9606 GN=FLG PE=1 SV=3                                                              | 434.9 | 2.074 | 1.084 | 612 555   | 1 573 109  | 816 305    |
| P23284     | Peptidyl-prolyl cis-trans isomerase B OS=Homo sapiens OX=9606 GN=PIIB PE=1 SV=2                                 | 23.7  | 1.016 | 24.38 | 59 248    | 112 122    | 62 051 286 |
| A0A0C4DGN4 | Zymogen granule protein 16 homolog B OS=Homo sapiens OX=9606 GN=ZG16B PE=1 SV=1                                 | 19.6  | 4.517 | 2.153 | 1 827 338 | 8 034 713  | 3 421 855  |
| P06733     | Alpha-enolase OS=Homo sapiens OX=9606 GN=ENO1 PE=1 SV=2                                                         | 47.1  | 4.655 | 3.312 | 921 269   | 4 564 445  | 2 969 887  |
| P98160     | Basement membrane-specific heparan sulfate proteoglycan core protein OS=Homo sapiens OX=9606 GN=HSPG2 PE=1 SV=4 | 468.5 |       | 1000  |           |            | 1 922 225  |
| P00734     | Prothrombin OS=Homo sapiens OX=9606 GN=F2 PE=1 SV=2                                                             | 70    | 1000  | 1000  |           | 68 460     | 6 723 894  |
| P62805     | Histone H4 OS=Homo sapiens OX=9606 GN=HIST1H4A PE=1 SV=2                                                        | 11.4  | 4.228 | 0.481 | 2 814 698 | 16 733 421 | 1 202 205  |
| P04196     | Histidine-rich glycoprotein OS=Homo sapiens OX=9606 GN=HRG PE=1 SV=1                                            | 59.5  |       | 57.81 | 15 439    | 99 841     | 11 061 712 |
| C9J406     | MICOS complex subunit MIC60 OS=Homo sapiens OX=9606 GN=IMMT PE=1 SV=1                                           | 73.2  |       | 1000  |           |            | 4 407 636  |
| P35442     | Thrombospondin-2 OS=Homo sapiens OX=9606 GN=THBS2 PE=1 SV=2                                                     | 129.9 |       | 1000  |           |            | 3 436 183  |
| P01023     | Alpha-2-macroglobulin OS=Homo sapiens OX=9606 GN=A2M PE=1 SV=3                                                  | 163.2 |       | 7.245 | 170 500   | 43 721     | 3 469 375  |
| Q08431     | Lactadherin OS=Homo sapiens OX=9606 GN=MFGE8 PE=1 SV=3                                                          | 43.1  | 0.001 | 27.93 | 154 872   |            | 19 943 799 |
| E9PF17     | Versican core protein OS=Homo sapiens OX=9606 GN=VCAN PE=1 SV=2                                                 | 176.7 | 0.712 | 0.465 | 4 688 793 | 3 339 429  | 2 629 844  |



|        |                                                                                            |       |       |       |            |           |            |
|--------|--------------------------------------------------------------------------------------------|-------|-------|-------|------------|-----------|------------|
| Q01469 | Fatty acid-binding protein 5 OS=Homo sapiens OX=9606 GN=FABP5 PE=1 SV=3                    | 15.2  | 2.276 | 1.236 | 1 063 748  | 2 030 889 | 1 052 884  |
| P31947 | 14-3-3 protein sigma OS=Homo sapiens OX=9606 GN=SFN PE=1 SV=1                              | 27.8  | 5.962 | 0.001 | 194 048    | 2 695 048 |            |
| Q5QNW6 | Histone H2B type 2-F OS=Homo sapiens OX=9606 GN=HIST2H2BF PE=1 SV=3                        | 13.9  | 5.335 | 1.15  | 1 374 217  | 8 101 146 | 1 992 132  |
| P05109 | Protein S100-A8 OS=Homo sapiens OX=9606 GN=S100A8 PE=1 SV=1                                | 10.8  | 2.245 | 1.816 | 3 413 420  | 8 180 162 | 6 171 888  |
| P32119 | Peroxiredoxin-2 OS=Homo sapiens OX=9606 GN=PRDX2 PE=1 SV=5                                 | 21.9  | 2.373 | 1.736 | 475 631    | 840 660   | 803 651    |
| P12273 | Prolactin-inducible protein OS=Homo sapiens OX=9606 GN=PIP PE=1 SV=1                       | 16.6  | 0.487 | 1.866 | 1 561 619  | 693 561   | 3 541 678  |
| Q96P63 | Serpin B12 OS=Homo sapiens OX=9606 GN=SERPINB12 PE=1 SV=1                                  | 46.2  | 1.144 | 1.483 | 2 160 855  | 2 699 507 | 3 658 133  |
| P00338 | L-lactate dehydrogenase A chain OS=Homo sapiens OX=9606 GN=LDHA PE=1 SV=2                  | 36.7  | 2.311 | 6.299 | 637 766    | 2 201 239 | 6 423 825  |
| Q5JX18 | Four and a half LIM domains protein 1 (Fragment) OS=Homo sapiens OX=9606 GN=FHL1 PE=1 SV=1 | 29.1  | 0.001 | 42.77 | 283 968    |           | 44 626 126 |
| P02671 | Fibrinogen alpha chain OS=Homo sapiens OX=9606 GN=FGA PE=1 SV=2                            | 94.9  | 0.001 | 13.01 | 242 044    |           | 9 308 706  |
| Q6NZ12 | Caveolae-associated protein 1 OS=Homo sapiens OX=9606 GN=CAVIN1 PE=1 SV=1                  | 43.5  |       | 1000  |            |           | 8 956 870  |
| P81605 | Dermcidin OS=Homo sapiens OX=9606 GN=DCD PE=1 SV=2                                         | 11.3  | 0.878 | 1.349 | 1 597 868  | 1 409 168 | 2 108 953  |
| P07996 | Thrombospondin-1 OS=Homo sapiens OX=9606 GN=THBS1 PE=1 SV=2                                | 129.3 |       | 1000  |            |           | 4 314 638  |
| P07900 | Heat shock protein HSP 90-alpha OS=Homo sapiens OX=9606 GN=HSP90AA1 PE=1 SV=5              | 84.6  | 1000  | 1000  |            | 224 887   | 2 127 037  |
| Q8WWA0 | Intelectin-1 OS=Homo sapiens OX=9606 GN=ITLN1 PE=1 SV=1                                    | 34.9  | 0.014 | 0.001 | 12 452 942 | 24 658    |            |
| P06576 | ATP synthase subunit beta mitochondrial OS=Homo sapiens OX=9606 GN=ATP5F1B PE=1 SV=3       | 56.5  | 1.736 | 3.654 | 348 341    | 927 933   | 2 719 680  |
| P01042 | Kininogen-1 OS=Homo sapiens OX=9606 GN=KNG1 PE=1 SV=2                                      | 71.9  | 0.204 | 58.59 | 148 106    | 14 553    | 14 828 856 |

|        |                                                                                                       |       |       |       |           |           |            |
|--------|-------------------------------------------------------------------------------------------------------|-------|-------|-------|-----------|-----------|------------|
| P18206 | Vinculin OS=Homo sapiens OX=9606 GN=VCL PE=1 SV=4                                                     | 123.7 | 0.682 | 6.079 | 209 980   | 80 825    | 2 489 326  |
| P60174 | Triosephosphate isomerase OS=Homo sapiens OX=9606 GN=TPI1 PE=1 SV=3                                   | 30.8  | 2.343 | 0.92  | 275 550   | 779 269   | 347 355    |
| B7Z6Z4 | cDNA FLJ56329. highly similar to Myosin light polypeptide 6 OS=Homo sapiens OX=9606 GN=MYL6 PE=1 SV=1 | 26.7  | 1000  | 1000  |           | 151 145   | 8 869 697  |
| J3QR68 | Haptoglobin (Fragment) OS=Homo sapiens OX=9606 GN=HP PE=1 SV=1                                        | 45    | 0.923 | 3.686 | 296 485   | 214 197   | 1 595 809  |
| P12110 | Collagen alpha-2(VI) chain OS=Homo sapiens OX=9606 GN=COL6A2 PE=1 SV=4                                | 108.5 | 1.22  | 31.02 | 303 644   | 132 739   | 13 859 775 |
| P51884 | Lumican OS=Homo sapiens OX=9606 GN=LUM PE=1 SV=2                                                      | 38.4  | 0.001 | 13.52 | 556 747   |           | 9 128 102  |
| P21291 | Cysteine and glycine-rich protein 1 OS=Homo sapiens OX=9606 GN=CSRP1 PE=1 SV=3                        | 20.6  | 0.001 | 17.55 | 284 626   |           | 15 167 061 |
| P08133 | Annexin A6 OS=Homo sapiens OX=9606 GN=ANXA6 PE=1 SV=3                                                 | 75.8  | 0.001 | 7.254 | 59 216    |           | 2 881 655  |
| P08238 | Heat shock protein HSP 90-beta OS=Homo sapiens OX=9606 GN=HSP90AB1 PE=1 SV=4                          | 83.2  | 1000  | 1000  |           | 116 746   | 1 181 134  |
| O75342 | Arachidonate 12-lipoxygenase. 12R-type OS=Homo sapiens OX=9606 GN=ALOX12B PE=1 SV=1                   | 80.3  | 1.134 | 1.661 | 290 418   | 312 236   | 519 182    |
| Q16527 | Cysteine and glycine-rich protein 2 OS=Homo sapiens OX=9606 GN=CSRP2 PE=1 SV=3                        | 20.9  |       | 1000  |           |           | 8 578 199  |
| Q01995 | Transgelin OS=Homo sapiens OX=9606 GN=TAGLN PE=1 SV=4                                                 | 22.6  | 0.001 | 2.437 | 1 301 022 |           | 3 375 481  |
| Q14574 | Desmocollin-3 OS=Homo sapiens OX=9606 GN=DSC3 PE=1 SV=3                                               | 99.9  | 1.207 | 1.717 | 536 353   | 725 441   | 930 781    |
| P14625 | Endoplasmin OS=Homo sapiens OX=9606 GN=HSP90B1 PE=1 SV=1                                              | 92.4  |       | 1000  |           |           | 3 495 217  |
| P00747 | Plasminogen OS=Homo sapiens OX=9606 GN=PLG PE=1 SV=2                                                  | 90.5  |       | 1000  |           |           | 2 546 712  |
| P02743 | Serum amyloid P-component OS=Homo sapiens OX=9606 GN=APCS PE=1 SV=2                                   | 25.4  | 0.001 | 40.22 | 1 163 541 |           | 63 837 550 |
| P31151 | Protein S100-A7 OS=Homo sapiens OX=9606 GN=S100A7 PE=1 SV=4                                           | 11.5  | 1.801 | 1.167 | 434 969   | 1 507 674 | 420 937    |

|            |                                                                                                  |       |       |       |           |           |           |
|------------|--------------------------------------------------------------------------------------------------|-------|-------|-------|-----------|-----------|-----------|
| A0A0A0MSV6 | Complement C1q subcomponent subunit B (Fragment) OS=Homo sapiens OX=9606 GN=C1QB PE=1 SV=6       | 24    | 0.001 | 9.824 | 428 154   |           | 8 474 815 |
| Q15582     | Transforming growth factor-beta-induced protein ig-h3 OS=Homo sapiens OX=9606 GN=TGFBI PE=1 SV=1 | 74.6  |       | 1000  |           |           | 2 506 857 |
| P02748     | Complement component C9 OS=Homo sapiens OX=9606 GN=C9 PE=1 SV=2                                  | 63.1  | 0.001 | 7.126 | 504 499   |           | 4 953 838 |
| P01040     | Cystatin-A OS=Homo sapiens OX=9606 GN=CSTA PE=1 SV=1                                             | 11    | 0.456 | 2.506 | 2 057 646 | 996 644   | 4 641 774 |
| Q6ZN40     | Tropomyosin 1 (Alpha). isoform CRA_f OS=Homo sapiens OX=9606 GN=TPM1 PE=1 SV=1                   | 37.4  | 0.001 | 2.366 | 68 650    |           | 1 172 949 |
| M0QZK8     | Uncharacterized protein OS=Homo sapiens OX=9606 PE=4 SV=1                                        | 11.6  | 1.305 | 1.083 | 735 058   | 1 416 610 | 789 921   |
| P50995     | Annexin A11 OS=Homo sapiens OX=9606 GN=ANXA11 PE=1 SV=1                                          | 54.4  | 0.836 | 23.31 | 47 232    | 39 505    | 3 238 475 |
| Q15149     | Plectin OS=Homo sapiens OX=9606 GN=PLEC PE=1 SV=3                                                | 531.5 |       | 1000  |           |           | 831 389   |
| P01009     | Alpha-1-antitrypsin OS=Homo sapiens OX=9606 GN=SERPINA1 PE=1 SV=3                                | 46.7  | 0.523 | 4.59  | 487 599   | 194 996   | 3 303 390 |
| P51911     | Calponin-1 OS=Homo sapiens OX=9606 GN=CNN1 PE=1 SV=2                                             | 33.2  | 0.001 | 10.09 | 165 932   |           | 4 661 641 |
| Q16270     | Insulin-like growth factor-binding protein 7 OS=Homo sapiens OX=9606 GN=IGFBP7 PE=1 SV=1         | 29.1  |       | 1000  |           |           | 3 480 607 |
| P19823     | Inter-alpha-trypsin inhibitor heavy chain H2 OS=Homo sapiens OX=9606 GN=ITIH2 PE=1 SV=2          | 106.4 |       | 1000  |           |           | 2 145 534 |
| G8JLG2     | CDSN OS=Homo sapiens OX=9606 GN=CDSN PE=1 SV=1                                                   | 51.6  | 1.406 | 2.676 | 601 717   | 859 709   | 1 593 342 |
| Q16853     | Membrane primary amine oxidase OS=Homo sapiens OX=9606 GN=AOC3 PE=1 SV=3                         | 84.6  | 1.142 | 12.45 | 101 673   | 50 740    | 7 642 017 |
| P40926     | Malate dehydrogenase mitochondrial OS=Homo sapiens OX=9606 GN=MDH2 PE=1 SV=3                     | 35.5  | 4.425 | 0.952 | 52 219    | 1 304 570 | 256 434   |

|            |                                                                                       |       |       |       |           |           |           |
|------------|---------------------------------------------------------------------------------------|-------|-------|-------|-----------|-----------|-----------|
| E9PFZ2     | Ceruloplasmin OS=Homo sapiens OX=9606<br>GN=CP PE=1 SV=1                              | 108.8 | 2.636 | 4.613 | 51 090    | 230 909   | 461 703   |
| Q9NZT1     | Calmodulin-like protein 5 OS=Homo sapiens<br>OX=9606 GN=CALML5 PE=1 SV=2              | 15.9  | 4.925 | 1.261 | 397 533   | 3 028 257 | 501 469   |
| P00558     | Phosphoglycerate kinase 1 OS=Homo sapiens<br>OX=9606 GN=PGK1 PE=1 SV=3                | 44.6  | 0.99  | 6.25  | 64 337    | 145 614   | 1 043 848 |
| P02792     | Ferritin light chain OS=Homo sapiens<br>OX=9606 GN=FTL PE=1 SV=2                      | 20    | 0.001 | 4.161 | 834 926   |           | 3 631 057 |
| P07384     | Calpain-1 catalytic subunit OS=Homo sapiens<br>OX=9606 GN=CAPN1 PE=1 SV=1             | 81.8  | 1.426 | 4.129 | 174 509   | 409 520   | 2 052 887 |
| P02747     | Complement C1q subcomponent subunit C<br>OS=Homo sapiens OX=9606 GN=C1QC PE=1<br>SV=3 | 25.8  | 0.001 | 9.491 | 405 030   |           | 8 785 534 |
| P61160     | Actin-related protein 2 OS=Homo sapiens<br>OX=9606 GN=ACTR2 PE=1 SV=1                 | 44.7  | 1000  | 1000  |           | 59 391    | 1 738 341 |
| P07476     | Involucrin OS=Homo sapiens OX=9606<br>GN=IVL PE=1 SV=2                                | 68.4  | 1000  |       |           | 831 200   |           |
| AOA087WVQ6 | Clathrin heavy chain OS=Homo sapiens<br>OX=9606 GN=CLTC PE=1 SV=1                     | 191.9 | 1000  | 1000  |           | 52 669    | 933 697   |
| F5GXS0     | Complement C4-B OS=Homo sapiens<br>OX=9606 GN=C4B PE=1 SV=1                           | 187.6 | 0.001 | 17.49 | 38 162    |           | 1 269 947 |
| H0Y7A7     | Calmodulin-2 (Fragment) OS=Homo sapiens<br>OX=9606 GN=CALM2 PE=1 SV=1                 | 20.7  | 1000  | 1000  |           | 1 269 146 | 51 075    |
| P07237     | Protein disulfide-isomerase OS=Homo sapiens<br>OX=9606 GN=P4HB PE=1 SV=3              | 57.1  | 3.062 | 8.215 | 28 459    | 163 283   | 1 129 350 |
| Q16610     | Extracellular matrix protein 1 OS=Homo<br>sapiens OX=9606 GN=ECM1 PE=1 SV=2           | 60.6  | 2.306 | 1.33  | 126 503   | 365 994   | 214 816   |
| P08603     | Complement factor H OS=Homo sapiens<br>OX=9606 GN=CFH PE=1 SV=4                       | 139   |       | 1000  |           |           | 788 827   |
| P46821     | Microtubule-associated protein 1B OS=Homo<br>sapiens OX=9606 GN=MAP1B PE=1 SV=2       | 270.5 |       | 1000  |           |           | 2 261 574 |
| P52943     | Cysteine-rich protein 2 OS=Homo sapiens<br>OX=9606 GN=CRIP2 PE=1 SV=1                 | 22.5  |       | 1000  |           |           | 6 350 152 |
| Q5T750     | Skin-specific protein 32 OS=Homo sapiens<br>OX=9606 GN=XP32 PE=1 SV=1                 | 26.2  | 1.082 | 1.131 | 2 618 564 | 3 416 486 | 2 974 391 |

|            |                                                                                                 |      |       |       |           |           |           |
|------------|-------------------------------------------------------------------------------------------------|------|-------|-------|-----------|-----------|-----------|
| P30101     | Protein disulfide-isomerase A3 OS=Homo sapiens OX=9606 GN=PDIA3 PE=1 SV=4                       | 56.7 | 1000  | 1000  |           | 64 313    | 1 374 169 |
| Q9NZU5     | LIM and cysteine-rich domains protein 1 OS=Homo sapiens OX=9606 GN=LMCD1 PE=1 SV=1              | 40.8 |       | 1000  |           |           | 1 172 181 |
| P04003     | C4b-binding protein alpha chain OS=Homo sapiens OX=9606 GN=C4BPA PE=1 SV=2                      | 67   | 0.001 | 20.91 | 41 215    |           | 4 607 305 |
| P00491     | Purine nucleoside phosphorylase OS=Homo sapiens OX=9606 GN=PNP PE=1 SV=2                        | 32.1 | 2.457 | 1.41  | 89 423    | 346 441   | 126 090   |
| A0A0A0MTH3 | Integrin-linked protein kinase OS=Homo sapiens OX=9606 GN=ILK PE=1 SV=1                         | 54.6 |       | 1000  |           |           | 721 621   |
| P09382     | Galectin-1 OS=Homo sapiens OX=9606 GN=LGALS1 PE=1 SV=2                                          | 14.7 |       | 1000  |           |           | 1 819 743 |
| P30837     | Aldehyde dehydrogenase X. mitochondrial OS=Homo sapiens OX=9606 GN=ALDH1B1 PE=1 SV=3            | 57.2 |       | 1000  |           |           | 420 189   |
| C9JF17     | Apolipoprotein D (Fragment) OS=Homo sapiens OX=9606 GN=APOD PE=1 SV=1                           | 24.1 | 0.21  | 3.809 | 827 521   | 48 247    | 2 980 241 |
| X6RJP6     | Transgelin-2 (Fragment) OS=Homo sapiens OX=9606 GN=TAGLN2 PE=1 SV=1                             | 21.1 |       | 8.921 | 51 188    | 53 473    | 2 778 755 |
| P01833     | Polymeric immunoglobulin receptor OS=Homo sapiens OX=9606 GN=PIGR PE=1 SV=4                     | 83.2 | 1.263 | 1.477 | 1 054 297 | 1 054 565 | 1 240 193 |
| G3V3U4     | Proteasome subunit alpha type OS=Homo sapiens OX=9606 GN=PSMA6 PE=1 SV=1                        | 11.6 | 1.361 | 1.508 | 345 184   | 439 769   | 548 912   |
| P09525     | Annexin A4 OS=Homo sapiens OX=9606 GN=ANXA4 PE=1 SV=4                                           | 35.9 | 1000  | 1000  |           | 371 153   | 418 889   |
| P0DPA2     | V-set and immunoglobulin domain-containing protein 8 OS=Homo sapiens OX=9606 GN=VSIG8 PE=2 SV=1 | 43.9 | 0.062 | 0.001 | 1 071 003 | 44 472    |           |
| Q08380     | Galectin-3-binding protein OS=Homo sapiens OX=9606 GN=LGALS3BP PE=1 SV=1                        | 65.3 | 0.001 | 11.32 | 40 712    |           | 1 175 630 |
| P17655     | Calpain-2 catalytic subunit OS=Homo sapiens OX=9606 GN=CAPN2 PE=1 SV=6                          | 79.9 |       | 1000  |           |           | 1 258 940 |
| P48745     | CCN family member 3 OS=Homo sapiens OX=9606 GN=CCN3 PE=1 SV=1                                   | 39.1 |       | 1000  |           |           | 1 585 307 |

|            |                                                                                                  |       |       |       |         |         |           |
|------------|--------------------------------------------------------------------------------------------------|-------|-------|-------|---------|---------|-----------|
| P03950     | Angiogenin OS=Homo sapiens OX=9606<br>GN=ANG PE=1 SV=1                                           | 16.5  |       | 1000  |         |         | 7 008 451 |
| B7ZKJ8     | ITIH4 protein OS=Homo sapiens OX=9606<br>GN=ITIH4 PE=1 SV=1                                      | 103.8 |       | 13.54 | 27 611  | 28 165  | 1 166 765 |
| O14818     | Proteasome subunit alpha type-7 OS=Homo sapiens OX=9606 GN=PSMA7 PE=1 SV=1                       | 27.9  | 1.39  | 1.49  | 166 918 | 331 016 | 456 350   |
| A0A0C4DH38 | Immunoglobulin heavy variable 5-51 OS=Homo sapiens OX=9606 GN=IGHV5-51 PE=3 SV=1                 | 12.7  |       | 1000  |         |         | 3 613 847 |
| P01011     | Alpha-1-antichymotrypsin OS=Homo sapiens OX=9606 GN=SERPINA3 PE=1 SV=2                           | 47.6  | 0.792 | 2.341 | 524 467 | 339 828 | 1 961 292 |
| P07737     | Profilin-1 OS=Homo sapiens OX=9606 GN=PFN1 PE=1 SV=2                                             | 15    | 2.002 | 10.76 | 73 160  | 200 657 | 1 187 235 |
| E9PK25     | Cofilin-1 OS=Homo sapiens OX=9606 GN=CFL1 PE=1 SV=1                                              | 22.7  | 3.301 | 18.5  | 73 612  | 291 701 | 1 902 475 |
| P06727     | Apolipoprotein A-IV OS=Homo sapiens OX=9606 GN=APOA4 PE=1 SV=3                                   | 45.4  |       | 1000  |         |         | 1 254 604 |
| Q15046     | Lysine--tRNA ligase OS=Homo sapiens OX=9606 GN=KARS PE=1 SV=3                                    | 68    |       | 1000  |         |         | 728 628   |
| P00325     | Alcohol dehydrogenase 1B OS=Homo sapiens OX=9606 GN=ADH1B PE=1 SV=2                              | 39.8  | 0.001 | 8.389 | 92 282  |         | 1 151 690 |
| K7EK77     | ATP synthase subunit alpha mitochondrial (Fragment) OS=Homo sapiens OX=9606 GN=ATP5F1A PE=1 SV=1 | 22.2  | 1.867 | 7.849 | 95 222  | 253 308 | 1 919 224 |
| Q9UI42     | Carboxypeptidase A4 OS=Homo sapiens OX=9606 GN=CPA4 PE=1 SV=2                                    | 47.3  | 1.011 | 1.191 | 436 078 | 489 788 | 518 292   |
| Q9NR12     | PDZ and LIM domain protein 7 OS=Homo sapiens OX=9606 GN=PDLIM7 PE=1 SV=1                         | 49.8  |       | 1000  |         |         | 2 352 668 |
| P21980     | Protein-glutamine gamma-glutamyltransferase 2 OS=Homo sapiens OX=9606 GN=TGM2 PE=1 SV=2          | 77.3  |       | 1000  |         |         | 599 576   |
| P59998     | Actin-related protein 2/3 complex subunit 4 OS=Homo sapiens OX=9606 GN=ARPC4 PE=1 SV=3           | 19.7  | 1.714 | 23.86 | 72 430  | 229 689 | 3 163 160 |
| A0A0A0MSQ0 | Plastin-3 OS=Homo sapiens OX=9606 GN=PLS3 PE=1 SV=1                                              | 69.3  | 1000  | 1000  |         | 44 104  | 78 282    |

|            |                                                                                                                    |       |        |       |         |           |           |
|------------|--------------------------------------------------------------------------------------------------------------------|-------|--------|-------|---------|-----------|-----------|
| J3KNQ4     | Alpha-parvin OS=Homo sapiens OX=9606<br>GN=PARVA PE=1 SV=1                                                         | 46.6  |        | 1000  |         |           | 226 091   |
| P47929     | Galectin-7 OS=Homo sapiens OX=9606<br>GN=LGALS7 PE=1 SV=2                                                          | 15.1  | 10.594 | 0.829 | 656 160 | 6 022 365 | 568 841   |
| P29536     | Leiomodin-1 OS=Homo sapiens OX=9606<br>GN=LMOD1 PE=1 SV=3                                                          | 67    |        | 1000  |         |           | 3 109 431 |
| P20774     | Mimecan OS=Homo sapiens OX=9606<br>GN=OGN PE=1 SV=1                                                                | 33.9  | 0.001  | 15.44 | 469 785 |           | 6 874 894 |
| Q8WX93     | Palladin OS=Homo sapiens OX=9606<br>GN=PALLD PE=1 SV=3                                                             | 150.5 |        | 1000  |         |           | 716 729   |
| Q9H3U7     | SPARC-related modular calcium-binding<br>protein 2 OS=Homo sapiens OX=9606<br>GN=SMOC2 PE=2 SV=2                   | 49.6  |        | 1000  |         |           | 646 965   |
| P48735     | Isocitrate dehydrogenase [NADP]<br>mitochondrial OS=Homo sapiens OX=9606<br>GN=IDH2 PE=1 SV=2                      | 50.9  |        | 1000  |         |           | 410 840   |
| P10301     | Ras-related protein R-Ras OS=Homo sapiens<br>OX=9606 GN=RRAS PE=1 SV=1                                             | 23.5  |        | 1000  |         |           | 625 649   |
| P08294     | Extracellular superoxide dismutase [Cu-Zn]<br>OS=Homo sapiens OX=9606 GN=SOD3 PE=1<br>SV=2                         | 25.8  |        | 1000  |         |           | 2 150 059 |
| P62140     | Serine/threonine-protein phosphatase PP1-<br>beta catalytic subunit OS=Homo sapiens<br>OX=9606 GN=PPP1CB PE=1 SV=3 | 37.2  |        | 1000  |         |           | 346 858   |
| P18669     | Phosphoglycerate mutase 1 OS=Homo<br>sapiens OX=9606 GN=PGAM1 PE=1 SV=2                                            | 28.8  | 1000   | 1000  |         | 168 058   | 415 579   |
| Q96QA5     | Gasdermin-A OS=Homo sapiens OX=9606<br>GN=GSDMA PE=1 SV=4                                                          | 49.3  | 1.357  | 1.406 | 660 379 | 879 530   | 912 017   |
| Q07960     | Rho GTPase-activating protein 1 OS=Homo<br>sapiens OX=9606 GN=ARHGAP1 PE=1 SV=1                                    | 50.4  |        | 1000  |         |           | 671 085   |
| AOA3B3IRN5 | Fibromodulin OS=Homo sapiens OX=9606<br>GN=FMOD PE=1 SV=1                                                          | 32.7  | 0.001  | 11.33 | 75 912  |           | 1 829 809 |
| P07225     | Vitamin K-dependent protein S OS=Homo<br>sapiens OX=9606 GN=PROS1 PE=1 SV=1                                        | 75.1  |        | 1000  |         |           | 2 039 996 |
| E9PHK0     | Tetranectin OS=Homo sapiens OX=9606<br>GN=CLEC3B PE=1 SV=1                                                         | 17.8  |        | 1000  |         |           | 822 733   |

|            |                                                                                                                    |      |       |       |         |         |            |
|------------|--------------------------------------------------------------------------------------------------------------------|------|-------|-------|---------|---------|------------|
| P06312     | Immunoglobulin kappa variable 4-1 OS=Homo sapiens OX=9606 GN=IGKV4-1 PE=1 SV=1                                     | 13.4 |       | 1000  |         |         | 13 190 201 |
| P13796     | Plastin-2 OS=Homo sapiens OX=9606 GN=LCP1 PE=1 SV=6                                                                | 70.2 |       | 1000  |         |         | 307 084    |
| E9PK52     | Band 4.1-like protein 2 OS=Homo sapiens OX=9606 GN=EPB41L2 PE=1 SV=1                                               | 90.9 |       | 1000  |         |         | 374 576    |
| Q03135     | Caveolin-1 OS=Homo sapiens OX=9606 GN=CAV1 PE=1 SV=4                                                               | 20.5 |       | 1000  |         |         | 4 081 415  |
| Q9ULV4     | Coronin-1C OS=Homo sapiens OX=9606 GN=CORO1C PE=1 SV=1                                                             | 53.2 |       | 1000  |         |         | 907 308    |
| Q9HC84     | Mucin-5B OS=Homo sapiens OX=9606 GN=MUC5B PE=1 SV=3                                                                | 596  | 0.925 | 0.001 | 119 972 | 110 987 |            |
| B7Z4L4     | Dolichyl-diphosphooligosaccharide--protein glycosyltransferase subunit 1 OS=Homo sapiens OX=9606 GN=RPN1 PE=1 SV=1 | 49.9 | 2.441 | 15.9  | 19 587  | 47 819  | 605 229    |
| P20851     | C4b-binding protein beta chain OS=Homo sapiens OX=9606 GN=C4BPB PE=1 SV=1                                          | 28.3 |       | 1000  |         |         | 1 331 937  |
| P27824     | Calnexin OS=Homo sapiens OX=9606 GN=CANX PE=1 SV=2                                                                 | 67.5 |       | 1000  |         |         | 1 905 619  |
| P00740     | Coagulation factor IX OS=Homo sapiens OX=9606 GN=F9 PE=1 SV=2                                                      | 51.7 |       | 1000  |         |         | 1 897 252  |
| P05164     | Myeloperoxidase OS=Homo sapiens OX=9606 GN=MPO PE=1 SV=1                                                           | 83.8 | 1.143 | 1.747 | 154 701 | 368 143 | 358 838    |
| Q96CG8     | Collagen triple helix repeat-containing protein 1 OS=Homo sapiens OX=9606 GN=CTHRC1 PE=1 SV=1                      | 26.2 |       | 1000  |         |         | 6 563 967  |
| P02760     | Protein AMBP OS=Homo sapiens OX=9606 GN=AMBP PE=1 SV=1                                                             | 39   | 0.122 | 15.73 | 149 814 | 18 263  | 2 842 627  |
| Q14195     | Dihydropyrimidinase-related protein 3 OS=Homo sapiens OX=9606 GN=DPYSL3 PE=1 SV=1                                  | 61.9 | 1000  | 1000  |         | 89 536  | 542 310    |
| P07858     | Cathepsin B OS=Homo sapiens OX=9606 GN=CTSB PE=1 SV=3                                                              | 37.8 | 0.001 | 10.65 | 61 154  |         | 1 562 756  |
| AOA0U1RQV3 | EGF-containing fibulin-like extracellular matrix protein 1 (Fragment) OS=Homo sapiens OX=9606 GN=EFEMP1 PE=1 SV=1  | 31.7 | 0.001 | 2.283 | 331 532 |         | 1 133 040  |



|        |                                                                                                    |       |       |       |         |         |           |
|--------|----------------------------------------------------------------------------------------------------|-------|-------|-------|---------|---------|-----------|
| Q9C075 | Keratin, type I cytoskeletal 23 OS=Homo sapiens OX=9606 GN=KRT23 PE=1 SV=2                         | 48.1  | 1000  | 1000  |         | 301 058 | 223 730   |
| P60842 | Eukaryotic initiation factor 4A-I OS=Homo sapiens OX=9606 GN=EIF4A1 PE=1 SV=1                      | 46.1  | 7.99  | 3.315 | 23 958  | 327 983 | 215 830   |
| Q8IZP2 | Putative protein FAM10A4 OS=Homo sapiens OX=9606 GN=ST13P4 PE=5 SV=1                               | 27.4  |       | 1000  |         |         | 423 965   |
| Q9Y6C2 | EMILIN-1 OS=Homo sapiens OX=9606 GN=EMILIN1 PE=1 SV=3                                              | 106.6 |       |       |         |         |           |
| H0YD13 | CD44 antigen OS=Homo sapiens OX=9606 GN=CD44 PE=1 SV=2                                             | 22.7  |       | 1000  |         |         | 290 750   |
| D6R9Z1 | Receptor of-activated protein C kinase 1 (Fragment) OS=Homo sapiens OX=9606 GN=RACK1 PE=1 SV=8     | 26.3  | 1000  | 1000  |         | 190 818 | 441 593   |
| Q6A163 | Keratin, type I cytoskeletal 39 OS=Homo sapiens OX=9606 GN=KRT39 PE=1 SV=2                         | 55.6  | 0.001 | 0.001 | 941 702 |         |           |
| P07360 | Complement component C8 gamma chain OS=Homo sapiens OX=9606 GN=C8G PE=1 SV=3                       | 22.3  |       | 1000  |         |         | 1 430 389 |
| P04899 | Guanine nucleotide-binding protein G(i) subunit alpha-2 OS=Homo sapiens OX=9606 GN=GNAI2 PE=1 SV=3 | 40.4  |       | 1000  |         |         | 867 424   |
| Q9Y6R7 | IgGFc-binding protein OS=Homo sapiens OX=9606 GN=FCGBP PE=1 SV=3                                   | 571.6 |       | 1000  |         |         | 605 189   |
| P13639 | Elongation factor 2 OS=Homo sapiens OX=9606 GN=EEF2 PE=1 SV=4                                      | 95.3  | 1000  | 1000  |         | 645 254 | 443 046   |
| P29279 | Connective tissue growth factor OS=Homo sapiens OX=9606 GN=CTGF PE=1 SV=2                          | 38.1  |       | 1000  |         |         | 102 939   |
| P13489 | Ribonuclease inhibitor OS=Homo sapiens OX=9606 GN=RNH1 PE=1 SV=2                                   | 49.9  | 1000  | 1000  |         | 45 571  | 172 496   |
| Q15404 | Ras suppressor protein 1 OS=Homo sapiens OX=9606 GN=RSU1 PE=1 SV=3                                 | 31.5  |       | 1000  |         |         | 412 358   |
| O94905 | Erlin-2 OS=Homo sapiens OX=9606 GN=ERLIN2 PE=1 SV=1                                                | 37.8  |       | 1000  |         |         | 783 840   |
| O14773 | Tripeptidyl-peptidase 1 OS=Homo sapiens OX=9606 GN=TPP1 PE=1 SV=2                                  | 61.2  |       | 1000  |         |         | 873 519   |

|        |                                                                                                      |       |       |       |  |        |           |         |
|--------|------------------------------------------------------------------------------------------------------|-------|-------|-------|--|--------|-----------|---------|
| P55290 | Cadherin-13 OS=Homo sapiens OX=9606<br>GN=CDH13 PE=1 SV=1                                            | 78.2  |       | 1000  |  |        | 2 967 442 |         |
| P49908 | Selenoprotein P OS=Homo sapiens OX=9606<br>GN=SELENOP PE=1 SV=3                                      | 43.2  |       | 1000  |  |        | 1 089 297 |         |
| P27169 | Serum paraoxonase/arylesterase 1 OS=Homo<br>sapiens OX=9606 GN=PON1 PE=1 SV=3                        | 39.7  |       | 1000  |  |        | 1 639 039 |         |
| P55058 | Phospholipid transfer protein OS=Homo<br>sapiens OX=9606 GN=PLTP PE=1 SV=1                           | 54.7  |       | 1000  |  |        | 642 557   |         |
| P61158 | Actin-related protein 3 OS=Homo sapiens<br>OX=9606 GN=ACTR3 PE=1 SV=3                                | 47.3  | 1000  | 1000  |  | 29 954 | 326 498   |         |
| E9PDU6 | Calponin (Fragment) OS=Homo sapiens<br>OX=9606 GN=CNN3 PE=1 SV=1                                     | 20.2  |       | 1000  |  |        | 152 572   |         |
| P05154 | Plasma serine protease inhibitor OS=Homo<br>sapiens OX=9606 GN=SERPINA5 PE=1 SV=3                    | 45.6  |       | 1000  |  |        | 561 747   |         |
| P33176 | Kinesin-1 heavy chain OS=Homo sapiens<br>OX=9606 GN=KIF5B PE=1 SV=1                                  | 109.6 |       | 1000  |  |        | 491 424   |         |
| Q07065 | Cytoskeleton-associated protein 4 OS=Homo<br>sapiens OX=9606 GN=CKAP4 PE=1 SV=2                      | 66    |       | 1000  |  |        | 481 910   |         |
| P38646 | Stress-70 protein mitochondrial OS=Homo<br>sapiens OX=9606 GN=HSPA9 PE=1 SV=2                        | 73.6  | 1000  | 1000  |  | 20 792 | 358 514   |         |
| O00159 | Unconventional myosin-Ic OS=Homo sapiens<br>OX=9606 GN=MYO1C PE=1 SV=4                               | 121.6 |       | 1000  |  |        | 134 782   |         |
| B4DPQ0 | Complement C1r subcomponent OS=Homo<br>sapiens OX=9606 GN=C1R PE=1 SV=1                              | 81.8  |       | 1000  |  |        | 60 192    |         |
| P35555 | Fibrillin-1 OS=Homo sapiens OX=9606<br>GN=FBN1 PE=1 SV=4                                             | 312.1 |       | 1000  |  |        | 406 352   |         |
| Q9Y277 | Voltage-dependent anion-selective channel<br>protein 3 OS=Homo sapiens OX=9606<br>GN=VDAC3 PE=1 SV=1 | 30.6  | 1.034 | 4.162 |  | 26 367 | 27 256    | 811 053 |
| Q96PD5 | N-acetylmuramoyl-L-alanine amidase<br>OS=Homo sapiens OX=9606 GN=PGLYRP2<br>PE=1 SV=1                | 62.2  |       | 1000  |  |        | 363 275   |         |
| Q15084 | Protein disulfide-isomerase A6 OS=Homo<br>sapiens OX=9606 GN=PDIA6 PE=1 SV=1                         | 48.1  | 1000  | 1000  |  | 15 615 | 198 018   |         |

|            |                                                                                                            |       |       |       |         |         |           |
|------------|------------------------------------------------------------------------------------------------------------|-------|-------|-------|---------|---------|-----------|
| A0A0A0MS15 | Immunoglobulin heavy variable 3-49<br>OS=Homo sapiens OX=9606 GN=IGHV3-49<br>PE=3 SV=1                     | 13    |       | 1000  |         |         | 1 744 048 |
| P24539     | ATP synthase F(0) complex subunit B1<br>mitochondrial OS=Homo sapiens OX=9606<br>GN=ATP5PB PE=1 SV=2       | 28.9  |       | 1000  |         |         | 431 898   |
| O75083     | WD repeat-containing protein 1 OS=Homo<br>sapiens OX=9606 GN=WDR1 PE=1 SV=4                                | 66.2  |       | 1000  |         |         | 374 808   |
| Q9UBC9     | Small proline-rich protein 3 OS=Homo sapiens<br>OX=9606 GN=SPRR3 PE=1 SV=2                                 | 18.1  | 1.549 | 0.001 | 179 655 | 257 193 |           |
| P15144     | Aminopeptidase N OS=Homo sapiens<br>OX=9606 GN=ANPEP PE=1 SV=4                                             | 109.5 |       | 1000  |         |         | 279 343   |
| Q15019     | Septin-2 OS=Homo sapiens OX=9606<br>GN=SEPT2 PE=1 SV=1                                                     | 41.5  |       | 1000  |         |         | 377 432   |
| P20073     | Annexin A7 OS=Homo sapiens OX=9606<br>GN=ANXA7 PE=1 SV=3                                                   | 52.7  |       | 1000  |         |         | 228 191   |
| Q8N436     | Inactive carboxypeptidase-like protein X2<br>OS=Homo sapiens OX=9606 GN=CPXM2 PE=2<br>SV=3                 | 85.8  |       |       |         |         |           |
| Q5JR08     | Rho-related GTP-binding protein RhoC<br>(Fragment) OS=Homo sapiens OX=9606<br>GN=RHOC PE=1 SV=8            | 21.5  |       | 1000  |         |         | 905 779   |
| Q99536     | Synaptic vesicle membrane protein VAT-1<br>homolog OS=Homo sapiens OX=9606<br>GN=VAT1 PE=1 SV=2            | 41.9  |       |       |         |         |           |
| Q9NZN4     | EH domain-containing protein 2 OS=Homo<br>sapiens OX=9606 GN=EHD2 PE=1 SV=2                                | 61.1  |       | 1000  |         |         | 1 898 281 |
| B4DT28     | Heterogeneous nuclear ribonucleoprotein R,<br>isoform CRA_a OS=Homo sapiens OX=9606<br>GN=HNRNPR PE=1 SV=1 | 55.7  |       | 1000  |         |         | 651 320   |
| B5MDF5     | GTP-binding nuclear protein Ran OS=Homo<br>sapiens OX=9606 GN=RAN PE=1 SV=1                                | 26.2  | 1000  | 1000  |         | 102 675 | 1 558 912 |
| Q8TF66     | Leucine-rich repeat-containing protein 15<br>OS=Homo sapiens OX=9606 GN=LRR15 PE=2<br>SV=2                 | 64.3  |       | 0.001 | 214 171 | 674 082 |           |

|            |                                                                                          |       |       |      |           |           |           |
|------------|------------------------------------------------------------------------------------------|-------|-------|------|-----------|-----------|-----------|
| AOA0U1RRM8 | Fermitin family homolog 2 (Fragment)<br>OS=Homo sapiens OX=9606 GN=FERMT2<br>PE=1 SV=1   | 61.9  |       | 1000 |           |           | 1 449 577 |
| Q92765     | Secreted frizzled-related protein 3 OS=Homo sapiens OX=9606 GN=FRZB PE=1 SV=2            | 36.2  |       | 1000 |           |           | 7 510 093 |
| Q08722     | Leukocyte surface antigen CD47 OS=Homo sapiens OX=9606 GN=CD47 PE=1 SV=1                 | 35.2  |       | 1000 |           |           | 2 008 365 |
| P07093     | Glia-derived nexin OS=Homo sapiens OX=9606 GN=SERPINE2 PE=1 SV=1                         | 44    |       | 1000 |           |           | 582 320   |
| J3QRN6     | Unconventional myosin-1d OS=Homo sapiens OX=9606 GN=MYO1D PE=1 SV=1                      | 111.2 |       | 1000 |           |           | 151 508   |
| P02763     | Alpha-1-acid glycoprotein 1 OS=Homo sapiens OX=9606 GN=ORM1 PE=1 SV=1                    | 23.5  | 1000  | 1000 |           | 263 871   | 58 616    |
| Q8IWU6     | Extracellular sulfatase Sulf-1 OS=Homo sapiens OX=9606 GN=SULF1 PE=1 SV=1                | 101   |       | 1000 |           |           | 398 478   |
| Q15746     | Myosin light chain kinase, smooth muscle OS=Homo sapiens OX=9606 GN=MYLK PE=1 SV=4       | 210.6 |       | 1000 |           |           | 719 644   |
| P84243     | Histone H3.3 OS=Homo sapiens OX=9606 GN=H3F3A PE=1 SV=2                                  | 15.3  | 5.924 | 0.74 | 872 765   | 5 212 878 | 724 408   |
| Q86VP6     | Cullin-associated NEDD8-dissociated protein 1 OS=Homo sapiens OX=9606 GN=CAND1 PE=1 SV=2 | 136.3 | 2.101 |      | 4 458 635 | 9 368 130 | 28 020    |

Galectin-3 protein is highlighted in yellow

MW [kDa]: Molecular Weight in kDa, **Gal3Ab-Gal3R**: immunoprecipitate of anti-galectin-3 antibody with recombinant human galectin-3, **C4-PH**: immunoprecipitate of C4 scFv-Fc antibody with human endarterectomy proteins, **P3-PH**: immunoprecipitate of P3 scFv-Fc antibody with human endarterectomy protein

**Figure S1. Ex vivo imaging of P3 scFv-Fc in Apoe<sup>-/-</sup> (B, C, D, E, F) and wild-type (WT) mice (A) using confocal microscopes.**

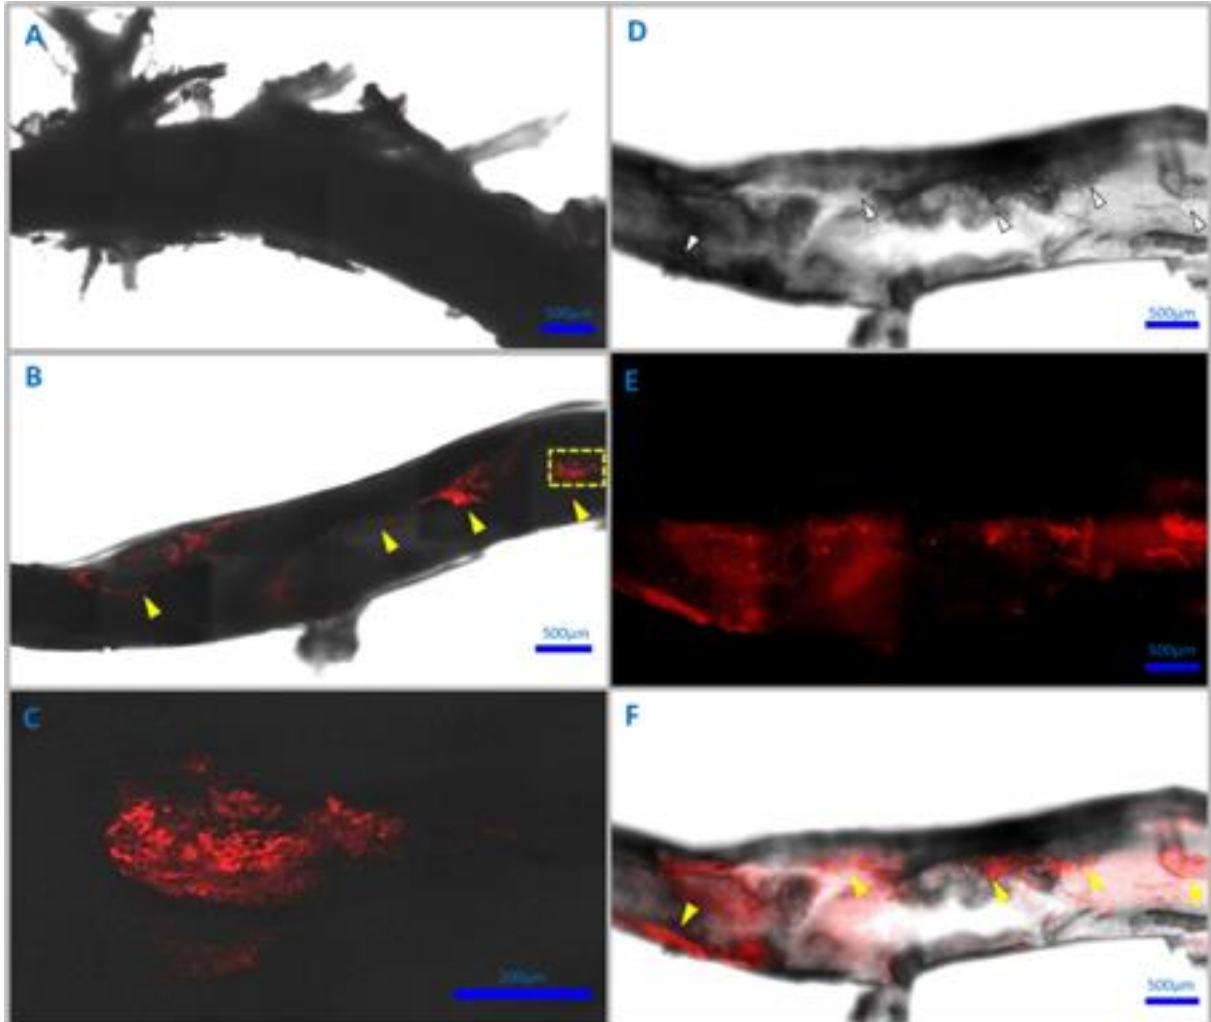

Confocal microscopy analysis was performed using P3 scFv-Fc coupled to Alexa-Fluor 648 dye after *ex vivo* injection in Apoe<sup>-/-</sup> and WT mice. A human IgG coupled to Alexa-Fluor 648 was used as negative control antibody. The presence of atheromatous plaques in the lumen of the aorta was observed in the Apoe<sup>-/-</sup> mouse (yellow arrowheads) (B, F). The yellow dotted square corresponds to the enlarged view of P3 binding (C). The merged image was performed to show the localization of the fluorescence signal through the thickness of the aorta (F). Size bars (A, B, D, E, F): 500  $\mu\text{m}$ ; Size bars (C): 200  $\mu\text{m}$ .
